# Supplementary material
Source: Springer Nature journal article supplement (https://www.springermedizin.de/resource/supplementary/12890_2014_627_MOESM6_ESM.pdf/9505444)

## A Inhbb and Fst levels in mice treated with sActRIIB-Fc

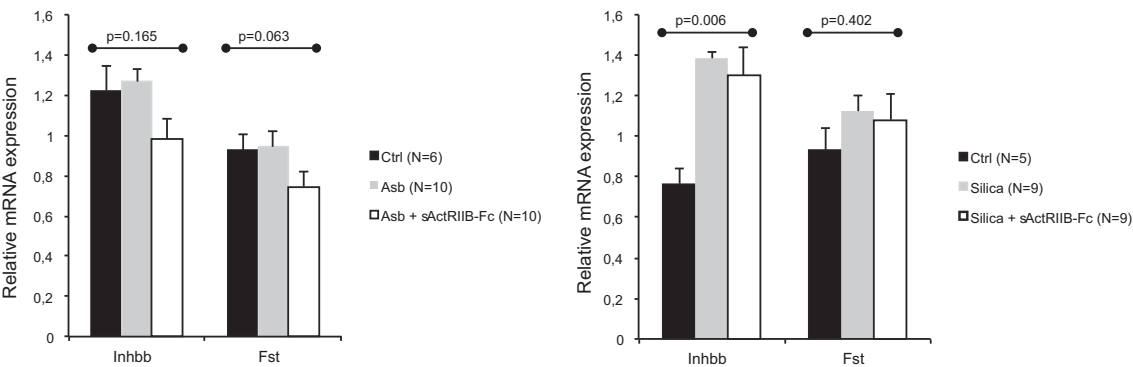

## B Profibrotic genes in mice treated with sActRIIB-Fc

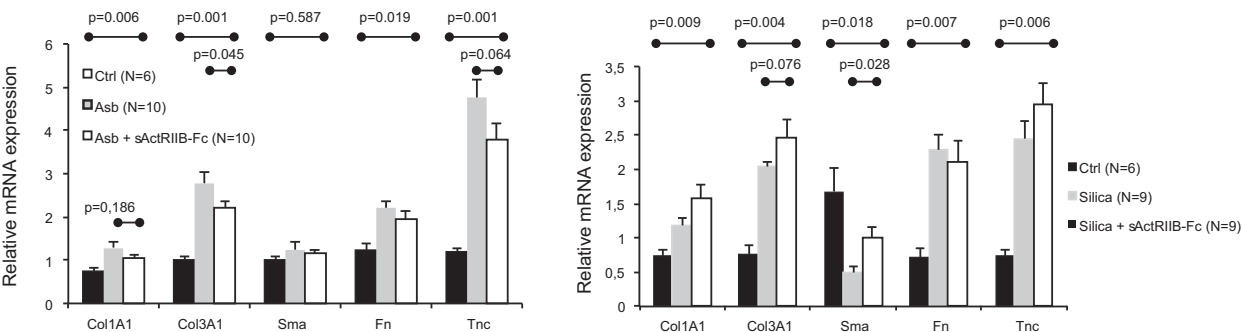

## C Hydroxyproline levels in mice treated with sActRIIB-Fc

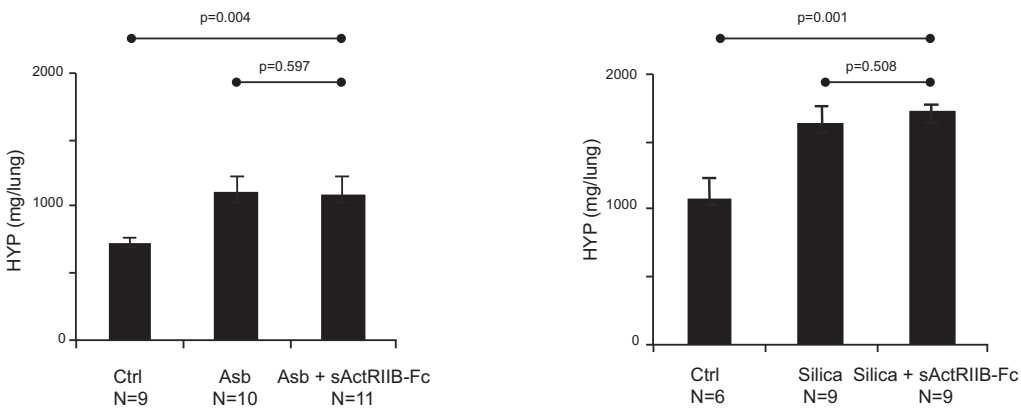

Supplement: MOESM6 [file 9505444]
